# Supplementary material for: Structure and growth mechanism of self-assembled monolayers of metal protoporphyrins and octacarboxylphthalocyanine on silicon dioxide
Source: Royal Society of Chemistry journal article supplement (doi:10.1039/c4ra11285g), 2014-01-01
Supplement: c4ra11285g1.pdf [file c4ra11285g1.pdf]

## Supporting information

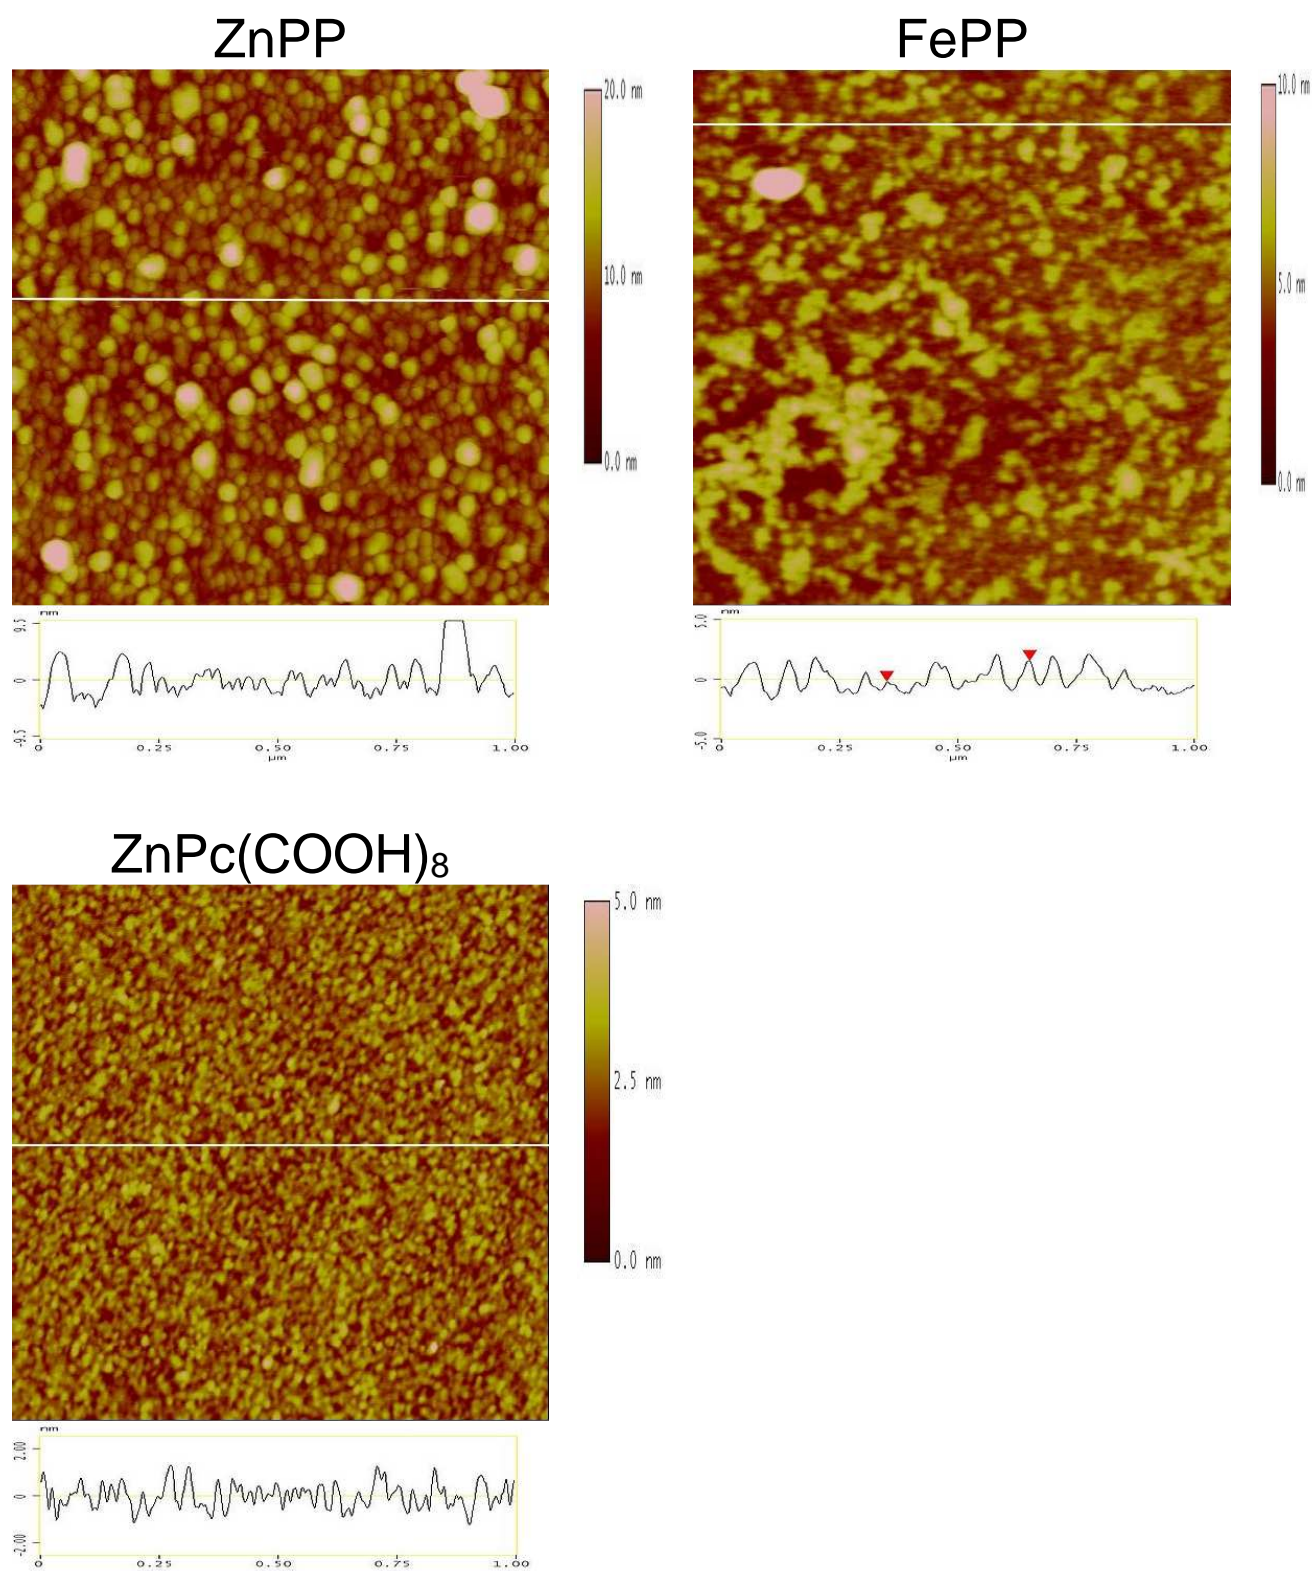

Figure 8 : AFM images ( $1 \times 1 \mu\text{m}^2$ ) of macrocycle layers grafted without coupling reagent (CDI).
